# Supplementary material for: Design of a mixed-anionic-ligand system for a blue-light-excited orange-yellow emission phosphor Ba1.31Sr3.69(BO3)3Cl:Eu2+
Source: Royal Society of Chemistry journal article supplement (doi:10.1039/c9tc06360a), 2020-01-01
Supplement: c9tc06360a1.pdf [file c9tc06360a1.pdf]

## Supporting Information

### Design of Mixed-Anionic-Ligands System for a Blue-Light- Excited Orange-Yellow Emission Phosphor

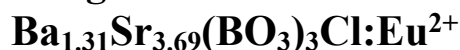

Haiyan Wu,<sup>a,b</sup> Huimin Li,<sup>c</sup> Lihong Jiang,<sup>\*a</sup> Ran Pang,<sup>a</sup> Su Zhang,<sup>a</sup> Da Li,<sup>a</sup> Guanyu Liu,<sup>a</sup>

Chengyu Li,<sup>\* a,b</sup> Jing Feng<sup>a</sup> and Hongjie Zhang<sup>a</sup>

a. State Key Laboratory of Rare Earth Resource Utilization Changchun Institute of Applied Chemistry Chinese Academy of Sciences Changchun 130022, China

b. University of Science and Technology of China Hefei 230026, China

c. Engineering Product Development Singapore University of Technology and Design 8 Somapah Road, Singapore 487372, Singapore

*\* Corresponding author: Tel.: +86-0431-85262258*

*E-mail address: cyli@ciac.ac.cn and lhjiang@ciac.ac.cn*

## Computational details

The calculations were carried out using density functional theory with the PBE.<sup>1</sup> The Vienna ab-initio simulation package (VASP)<sup>2-5</sup> was employed. The plane wave energy cutoff was set as 400 eV. The Fermi scheme was employed for electron occupancy with an energy smearing of 0.1 eV. The first Brillouin zone was sampled in the Monkhorst–Pack grid.<sup>6,7</sup> The energy (converged to  $1.0 \times 10^{-6}$  eV/atom) and force (converged to 0.01 eV/Å) were set as the convergence criterion for geometry optimization. The spin polarization was considered in all calculation. For Eu, the Coulomb interaction corrections with Hubbard-like U term of 6 eV are also considered for 4f.

**Table S1** Rietveld fitting results of BSBOC:0.025Eu<sup>2+</sup>

|                                 |                             |
|---------------------------------|-----------------------------|
| formula                         | BSBOC:0.025Eu <sup>2+</sup> |
| crystal system                  | orthorhombic                |
| space group                     | <i>Pnma</i>                 |
| <i>a</i> (Å)                    | 6.9368(3)                   |
| <i>b</i> (Å)                    | 16.4567(8)                  |
| <i>c</i> (Å)                    | 9.5281(5)                   |
| $\alpha = \beta = \gamma$ (deg) | 90                          |
| <i>Z</i>                        | 4                           |
| <i>V</i> (Å <sup>3</sup> )      | 1087.70(11)                 |
| <i>R</i> <sub>p</sub>           | 0.0528                      |
| <i>R</i> <sub>wp</sub>          | 0.0730                      |
| $\chi^2$                        | 3.744                       |

**Table S2** Atomic positions of BSBOC:0.025Eu<sup>2+</sup>

| atom | site | x      | y      | z      | Occupancy | U <sub>iso</sub> |
|------|------|--------|--------|--------|-----------|------------------|
| Ba1  | 8d   | 0.3615 | 0.4104 | 0.1114 | 0.6550    | 0.0135           |
| Sr1  | 8d   | 0.3615 | 0.4104 | 0.1114 | 0.3416    | 0.0135           |
| Sr2  | 8d   | 0.4964 | 0.3998 | 0.7194 | 0.9892    | 0.0096           |
| Sr3  | 4c   | 0.4759 | 0.2500 | 0.4694 | 0.9892    | 0.0110           |
| Eu1  | 8d   | 0.3615 | 0.4104 | 0.1114 | 0.0034    | 0.0135           |
| Eu2  | 8d   | 0.4964 | 0.3998 | 0.7194 | 0.0108    | 0.0096           |
| Eu3  | 4c   | 0.4759 | 0.2500 | 0.4694 | 0.0108    | 0.0110           |
| Cl1  | 4c   | 0.1036 | 0.2500 | 0.3192 | 1.000     | 0.0184           |
| O1   | 4c   | 0.3623 | 0.2500 | 0.7220 | 1.000     | 0.0145           |
| O2   | 8d   | 0.2747 | 0.1832 | 0.8719 | 1.000     | 0.0059           |
| O3   | 8d   | 0.6746 | 0.4350 | 0.9457 | 1.000     | 0.0323           |
| O4   | 8d   | 0.2616 | 0.5006 | 0.8389 | 1.000     | 0.0117           |
| O5   | 8d   | 0.9741 | 0.1019 | 0.0770 | 1.000     | 0.0400           |
| B1   | 8d   | 0.7853 | 0.4433 | 0.0935 | 1.000     | 0.0120           |
| B2   | 4c   | 0.2969 | 0.2500 | 0.8869 | 1.000     | 0.0140           |

**Table S3** Bond distance (Å) of BSBOC:0.025Eu<sup>2+</sup>

|             |             |                |             |
|-------------|-------------|----------------|-------------|
| Sr1/Eu1-O2  | 2.81865(10) | Sr2/Eu2-O4     | 2.61251(7)  |
| Sr1/Eu1-O3  | 2.61406(11) | Sr2/Eu2-O4     | 2.56248(8)  |
| Sr1/Eu1-O3  | 2.71517(9)  | Sr2/Eu2-O5     | 2.82811(14) |
| Sr1/Eu1-O4  | 2.75112(9)  | (average)      | 2.6202988   |
| Sr1/Eu1-O4  | 3.07060(11) | Sr3/Eu3-O2(×2) | 2.79106(8)  |
| Sr1/Eu1-O4  | 3.03378(11) | Sr3/Eu3-O1     | 2.53240(11) |
| Sr1/Eu1-O5  | 2.71484(12) | Sr3/Eu3-O5(×2) | 2.47674(11) |
| Sr1/Eu1-O5  | 3.07652(14) | Sr3/Eu3-Cl1    | 2.95260(11) |
| Sr1/Eu1-Cl1 | 3.19762(11) | Sr3/Eu3-Cl1    | 2.88921(13) |
| (average)   | 2.8880429   | (average)      | 2.7014045   |
| Sr2/Eu2-O1  | 2.60056(11) |                |             |
| Sr2/Eu2-O2  | 2.49905(7)  |                |             |
| Sr2/Eu2-O2  | 2.49966(8)  |                |             |
| Sr2/Eu2-O3  | 2.56037(9)  |                |             |
| Sr2/Eu2-O3  | 2.79960(9)  |                |             |

**Table S4** Quantum efficiencies of BSBOC:0.025Eu<sup>2+</sup> and commercial YAG:Ce<sup>3+</sup>

|             | BSBOC:0.025Eu <sup>2+</sup> (%) | YAG:Ce <sup>3+</sup> (%) |
|-------------|---------------------------------|--------------------------|
| Internal QE | 55.5                            | 94.8                     |
| Absorption  | 45.0                            | 85.2                     |
| External QE | 25.0                            | 80.7                     |

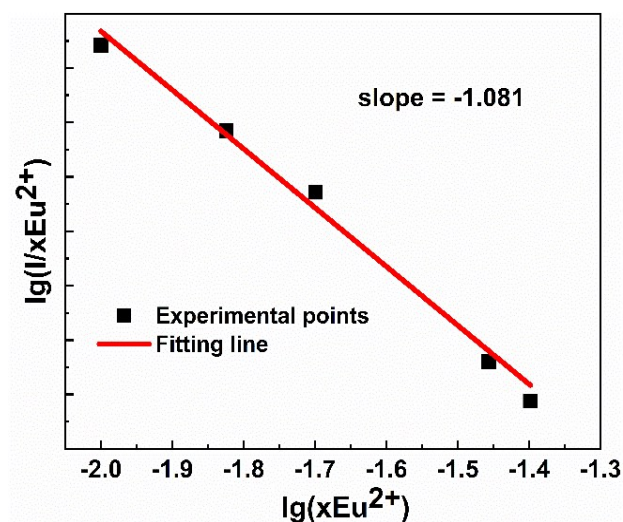

**Fig. S1** Relationship of  $\lg(I/xEu^{2+})$  with  $\lg(xEu^{2+})$  in BSBOC: $xEu^{2+}$  phosphors under 450 nm excitation.

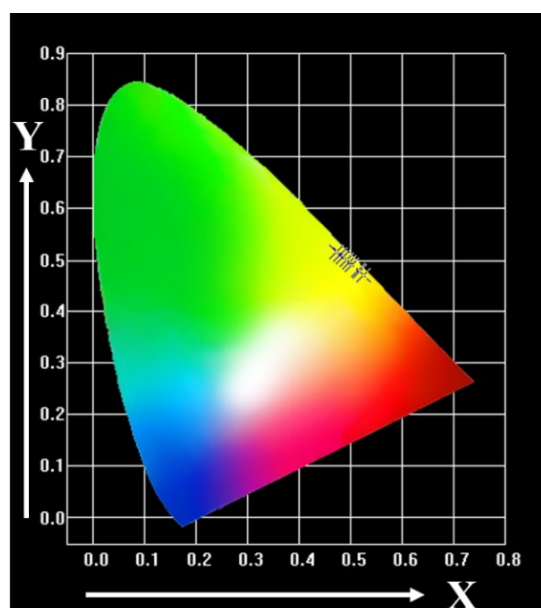

**Fig. S2** CIE coordinates of BSBOC:0.025Eu<sup>2+</sup> at different temperature ( $T = 273\text{--}473\text{K}$ ).

**Table S5** CIE coordinates of BSB OC:0.025Eu<sup>2+</sup> at different temperature ( $T = 273\text{--}473$  K).

| Temperature (K) | CIE coordinates (x, y) |
|-----------------|------------------------|
| 273             | (0.524, 0.471)         |
| 298             | (0.518, 0.477)         |
| 323             | (0.514, 0.480)         |
| 348             | (0.503, 0.490)         |
| 373             | (0.497, 0.495)         |
| 398             | (0.492, 0.499)         |
| 423             | (0.484, 0.506)         |
| 448             | (0.480, 0.509)         |
| 473             | (0.472, 0.515)         |

## Reference

1. J. P. Perdew and K. Burke, *Phys. Rev. B*, 1996, **77**, 3865-3868.
2. G. Kresse and J. Furthmüller, *Comp. Mater. Sci.*, 1996, **6**, 15-50.
3. G. Kresse and J. Hafner, *Phys. Rev. B*, 1993, **47**, 558-561.
4. G. Kresse and J. Hafner, *Phys. Rev. B*, 1994, **49**, 14251-14269.
5. G. Kresse and J. Furthmüller, *Phys. Rev. B*, 1996, **54**, 11169-11186.
6. H. J. Monkhorst and J. D. Pack, *Phys. Rev. B*, 1976, **13**, 5188-5192.
7. K. O. Obodo, C. N. M. Ouma, G. Gebreyesus, J. T. Obodo, S. O. Ezeonu and B. Bouhafs, *Mater. Res. Express*, 2019, **6**, 106307.
